# Supplementary material for: Evaluation of Volatilomic Fingerprint from Apple Fruits to Ciders: A Useful Tool to Find Putative Biomarkers for Each Apple Variety
Source: MDPI journal article supplement (doi:10.3390/foods9121830), 2020-12-09
Supplement: s1 [file s1]

## Supplementary Materials

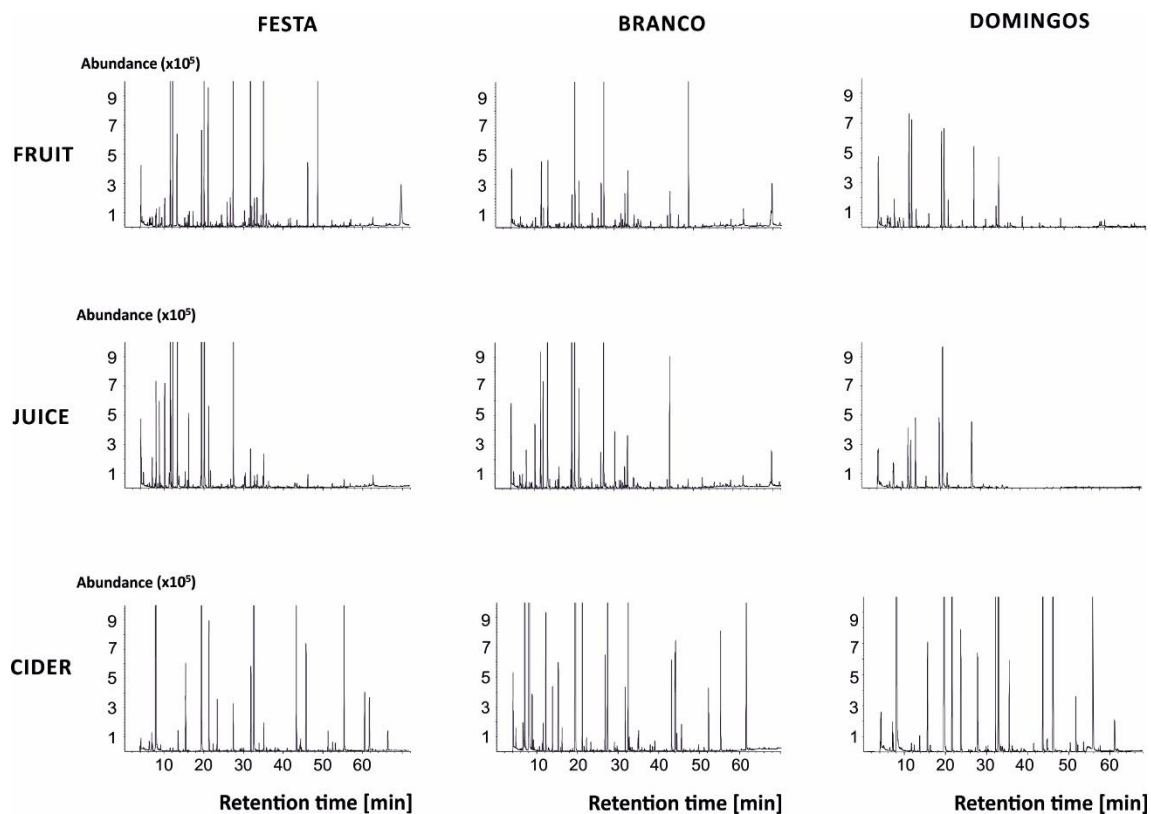

**Figure 1.** Total ion chromatograms obtained by HS-SPME/GC-qMS analysis of apple fruits, juices, and ciders of the different varieties (Festa, Branco, Domingos).
